# Supplementary material for: A combined gas-phase dissociative ionization, dissociative electron attachment and deposition study on the potential FEBID precursor [Au(CH3)2Cl]2
Source: publisher site journal article supplement (doi:10.3762/bjnano.14.98), 2023-12-06
Supplement: Additional file 1 [file 2190-4286-14-98-S1.pdf]

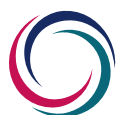

## Supporting Information

for

### **A combined gas-phase dissociative ionization, dissociative electron attachment and deposition study on the potential FEBID precursor $[\text{Au}(\text{CH}_3)_2\text{Cl}]_2$**

Elif Bilgilişoy, Ali Kamali, Thomas Xaver Gentner, Gerd Ballmann, Sjoerd Harder, Hans-Peter Steinrück, Hubertus Marbach and Oddur Ingólfsson

*Beilstein J. Nanotechnol.* **2023**, *14*, 1178–1199. doi:10.3762/bjnano.14.98

## Additional figures and tables

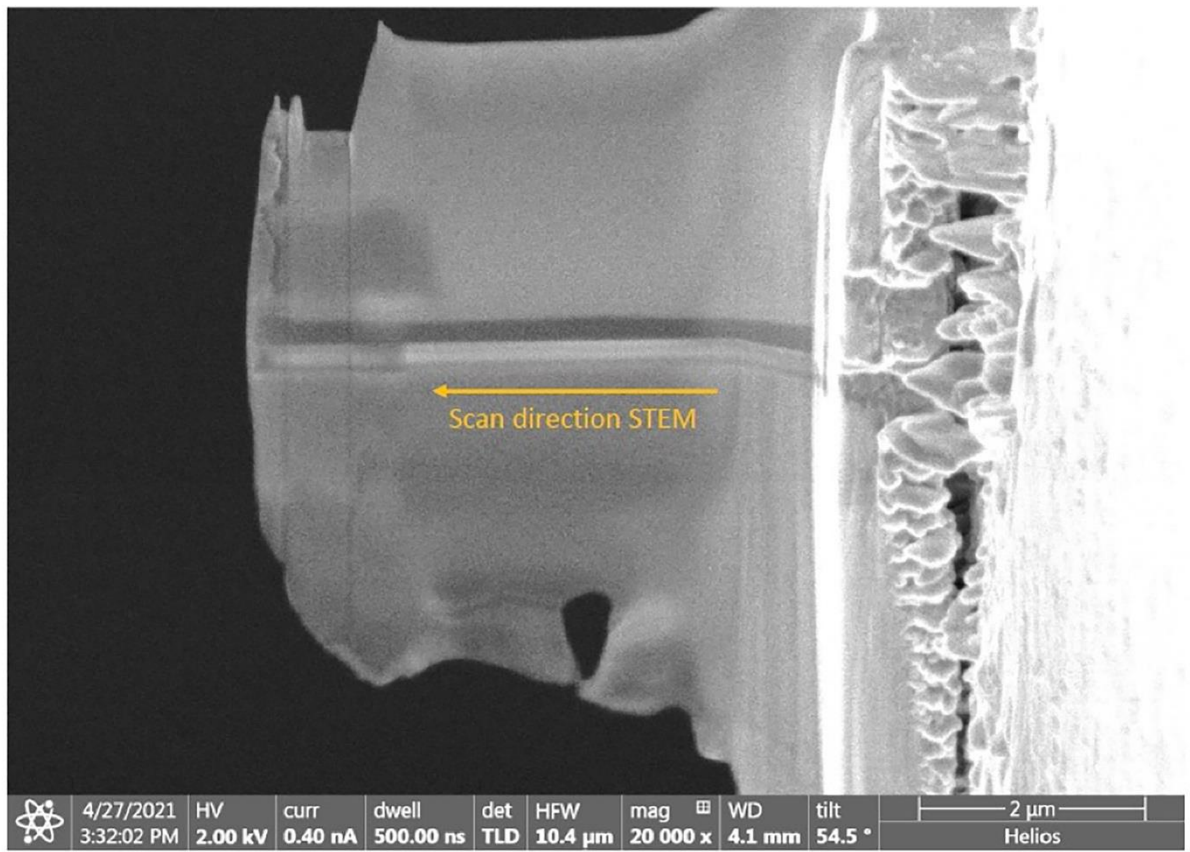

**Figure S1:** Prepared lamella for STEM and SAED experiments.

The observed gold nanoparticles (Figure 1d) have irregular shapes. Therefore, the diameter of the selected particle was defined by considering the perpendicular distance between two parallel tangent lines of the particle at an arbitrary angle. This particle size analysis method is known as Feret diameter or caliper diameter. Beside the diameter of the particles, their approximate amount in one SEM image was also acquired by firstly removing the background from the SEM image, then applying the image threshold, and finally counting the numbers automatically (Figure S2).

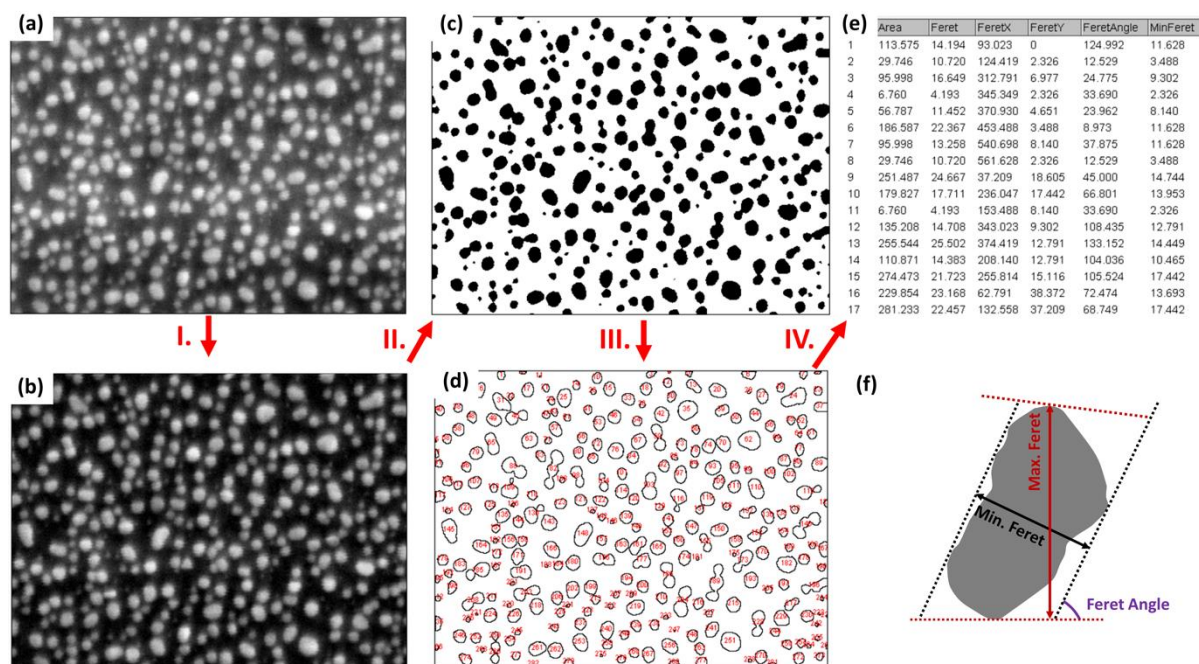

**Figure S2:** (a) An SEM image of FEBID gold nanoparticles. (b) Background-subtracted SEM image of (a) using ImageJ. (c) Image after the automatic threshold was applied in ImageJ program. (d) and (e) Results of automatic particle count in the program. (f) Illustration of the Feret parameters: minimum Feret (min. Feret), maximum Feret (max. Feret), and Feret angle.

The comparative histogram graphs of particle numbers versus particle diameters with respect to the beam currents for 400 pA (blue bars), 1.5 nA (green bars) and 3 nA (purple bars) were obtained from SEM and AFM, and plotted in Figure S3.

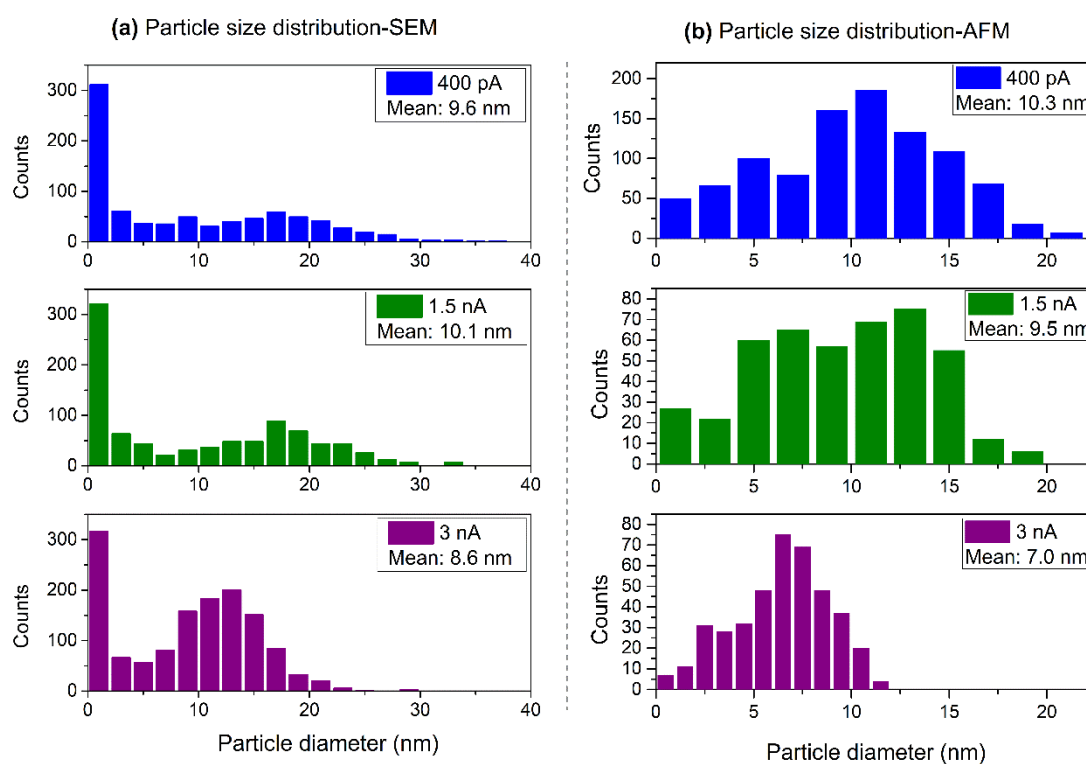

**Figure S3:** (a) and (b) The particle size distributions obtained from SEM and AFM, respectively, for the FEBID gold nanoparticles with respect to the different applied beam currents.

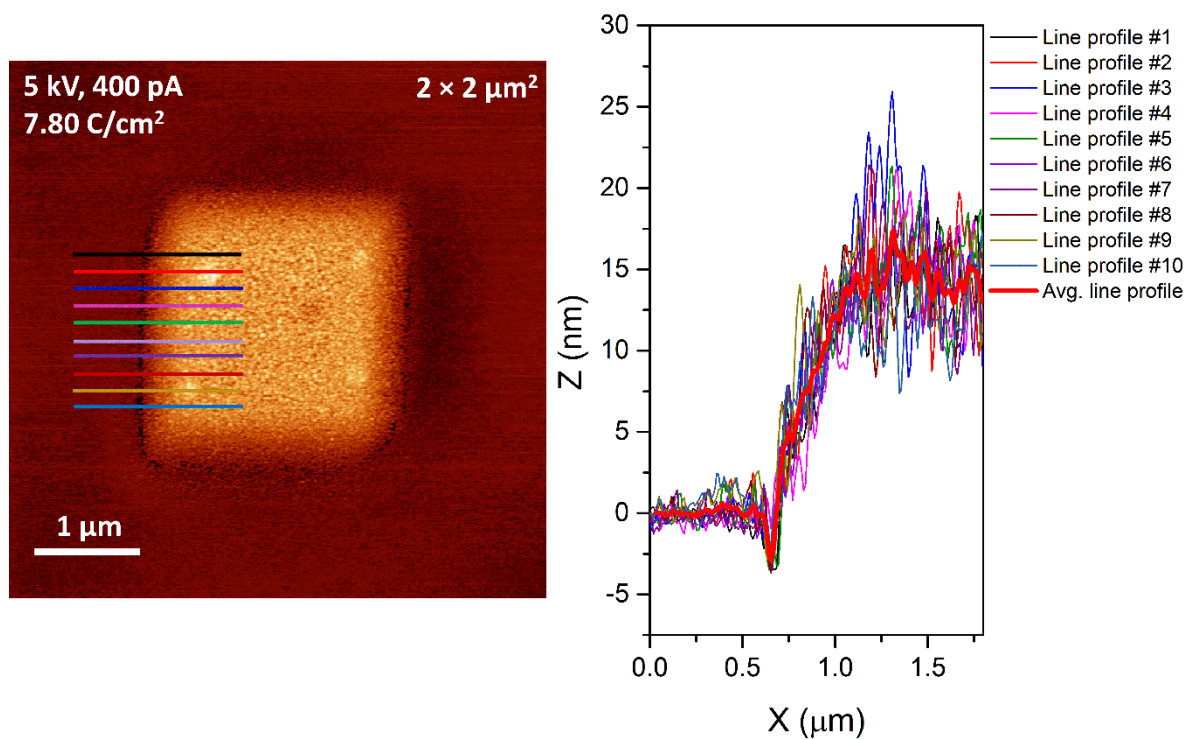

**Figure S4:** The AFM image of the FEBID deposit (5 kV, 400 pA) is shown on the left, and the line profiles from 10 different lines and their average line profile are shown on the right.

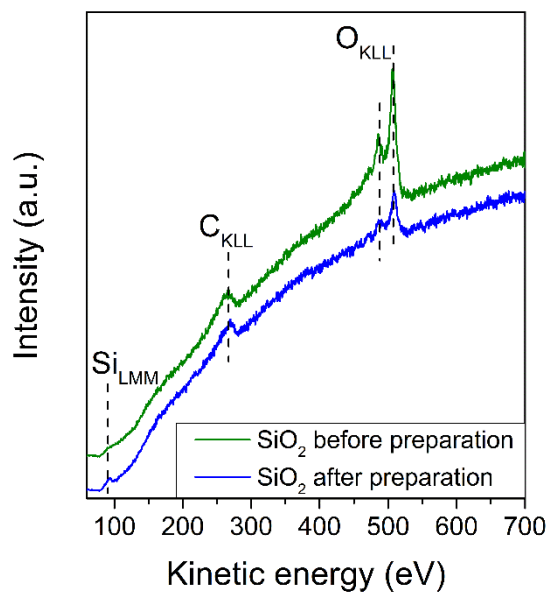

**Figure S5:** AES on Si(111) before surface treatment (green line) and after surface treatment (45 min. Ar<sup>+</sup> sputtering + 90 min. annealing at 823 K under oxygen) on the same substrate (blue line).

**Table S1:** All optimized geometries (parent molecule and cations) and their Gibbs free energy (Eh) at the PBE0/ def2-TZVP level of theory, expressed as Cartesian coordinates (Å).

| Molecule                                                                        | Cartesian coordinates (Å) |           |           |           | Final Gibbs free energy (Eh) |
|---------------------------------------------------------------------------------|---------------------------|-----------|-----------|-----------|------------------------------|
| [Au <sub>2</sub> Cl <sub>2</sub> (CH <sub>3</sub> ) <sub>4</sub> ]              | Au                        | -2.072104 | 3.052679  | -0.000000 | -1351.07736325               |
|                                                                                 | Au                        | -1.989186 | -0.547564 | 0.000000  |                              |
|                                                                                 | Cl                        | -3.700537 | 1.214412  | -0.000000 |                              |
|                                                                                 | Cl                        | -0.360753 | 1.290702  | -0.000000 |                              |
|                                                                                 | C                         | -0.673402 | 4.528115  | 0.000000  |                              |
|                                                                                 | H                         | -1.112834 | 5.522029  | 0.000000  |                              |
|                                                                                 | H                         | -0.068504 | 4.373457  | -0.893801 |                              |
|                                                                                 | H                         | -0.068504 | 4.373457  | 0.893801  |                              |
|                                                                                 | C                         | -3.481400 | 4.517269  | 0.000000  |                              |
|                                                                                 | H                         | -4.446950 | 4.013642  | 0.000000  |                              |
|                                                                                 | H                         | -3.365518 | 5.129161  | -0.893266 |                              |
|                                                                                 | H                         | -3.365518 | 5.129161  | 0.893266  |                              |
|                                                                                 | C                         | -3.387887 | -2.023002 | 0.000000  |                              |
|                                                                                 | H                         | -2.948454 | -3.016916 | 0.000008  |                              |
|                                                                                 | H                         | -3.992779 | -1.868350 | -0.893805 |                              |
|                                                                                 | H                         | -3.992789 | -1.868340 | 0.893796  |                              |
|                                                                                 | C                         | -0.579889 | -2.012155 | 0.000000  |                              |
|                                                                                 | H                         | 0.385662  | -1.508527 | -0.000000 |                              |
|                                                                                 | H                         | -0.695771 | -2.624047 | -0.893266 |                              |
|                                                                                 | H                         | -0.695770 | -2.624046 | 0.893267  |                              |
| [Au <sub>2</sub> Cl <sub>2</sub> (CH <sub>3</sub> ) <sub>4</sub> ] <sup>+</sup> | Au                        | -2.035627 | 2.919475  | -0.027570 | -1350.73933480               |
|                                                                                 | Au                        | -2.017481 | -0.444636 | -0.010941 |                              |
|                                                                                 | Cl                        | -3.788694 | 1.232543  | 0.016664  |                              |
|                                                                                 | Cl                        | -0.261716 | 1.250851  | -0.054282 |                              |
|                                                                                 | C                         | -0.669548 | 4.439482  | -0.345837 |                              |
|                                                                                 | H                         | -1.190608 | 5.274419  | -0.803414 |                              |
|                                                                                 | H                         | 0.084423  | 4.008933  | -1.000436 |                              |
|                                                                                 | H                         | -0.281488 | 4.671763  | 0.645097  |                              |
|                                                                                 | C                         | -3.414131 | 4.432888  | 0.268665  |                              |
|                                                                                 | H                         | -4.246110 | 3.972802  | 0.796011  |                              |
|                                                                                 | H                         | -3.684834 | 4.768818  | -0.731350 |                              |
|                                                                                 | H                         | -2.929968 | 5.205118  | 0.858956  |                              |
|                                                                                 | C                         | -3.388970 | -1.973133 | -0.245290 |                              |
|                                                                                 | H                         | -2.926816 | -2.738725 | -0.861040 |                              |
|                                                                                 | H                         | -4.248317 | -1.518273 | -0.731478 |                              |
|                                                                                 | H                         | -3.615120 | -2.321717 | 0.761195  |                              |
|                                                                                 | C                         | -0.632326 | -1.956939 | 0.242645  |                              |
|                                                                                 | H                         | 0.172322  | -1.510011 | 0.821366  |                              |
|                                                                                 | H                         | -0.322947 | -2.225852 | -0.766396 |                              |
|                                                                                 | H                         | -1.114845 | -2.775127 | 0.767926  |                              |
| [Au <sub>2</sub> Cl <sub>2</sub> (CH <sub>3</sub> ) <sub>2</sub> ] <sup>+</sup> | Au                        | -1.819984 | 2.875611  | 0.004036  | -1271.03956804               |
|                                                                                 | Au                        | -2.287517 | -0.353586 | 0.107295  |                              |
|                                                                                 | Cl                        | -3.785590 | 1.579411  | 0.201733  |                              |
|                                                                                 | Cl                        | -0.320606 | 0.946395  | -0.090320 |                              |
|                                                                                 | C                         | -2.858006 | 4.635135  | 0.063053  |                              |
|                                                                                 | H                         | -3.352792 | 4.697531  | 1.029611  |                              |
|                                                                                 | H                         | -3.556767 | 4.643787  | -0.770184 |                              |
|                                                                                 | H                         | -2.043623 | 5.357541  | -0.051498 |                              |
|                                                                                 | C                         | -1.251219 | -2.114009 | 0.047678  |                              |

|                                                    |                                                                                                                                                                                                                                                                                                                                                 |                  |
|----------------------------------------------------|-------------------------------------------------------------------------------------------------------------------------------------------------------------------------------------------------------------------------------------------------------------------------------------------------------------------------------------------------|------------------|
|                                                    | H -0.553619 -2.123453 0.882026<br>H -0.754647 -2.175376 -0.918170<br>H -2.065026 -2.837038 0.159960                                                                                                                                                                                                                                             |                  |
| $[\text{Au}_2\text{Cl}_2(\text{CH}_3)]^+$          | Au -2.710731 3.628260 1.202848<br>Au -0.876681 0.582329 -0.199154<br>Cl -2.761916 -1.062272 -0.912648<br>Cl -1.072379 2.990585 -0.250808<br>C -1.119442 -1.403061 -0.364717<br>H -1.118450 -1.935881 0.580988<br>H -0.527731 -1.861705 -1.150811<br>H 0.579778 0.504658 0.312600                                                                | -1231.21077897   |
| $[\text{Au}_2\text{Cl}_2]^+$                       | Au -2.056269 2.768478 0.000000<br>Au -2.005021 -0.263367 0.000000<br>Cl -3.870060 1.221887 -0.000000<br>Cl -0.191230 1.283232 -0.000000                                                                                                                                                                                                         | -1191.35489549   |
| $[\text{Au}_2\text{Cl}(\text{CH}_2\text{CH}_3)]^+$ | Au -2.333092 3.153032 0.004622<br>Au -2.219375 -0.696612 0.077322<br>Cl -0.911089 1.215951 0.078406<br>C -3.533568 4.824477 -0.052434<br>H -3.801526 4.928425 -1.104208<br>H -4.372147 4.586128 0.601986<br>H -2.880646 5.612803 0.325635<br>C -3.225313 -2.301311 0.078777<br>H -2.770456 -3.294805 0.109287<br>H -4.316942 -2.343808 0.049542 | -731.29110113    |
| $[\text{Au}_2\text{Cl}(\text{CH}_3)]^+$            | Au -1.973262 2.076357 -0.883223<br>Au 1.414636 0.775184 0.287775<br>Cl -0.345118 2.376157 0.689014<br>C 2.984080 -0.502369 -0.097905<br>H 3.660789 0.071733 -0.729953<br>H 2.520563 -1.355607 -0.594045<br>H 3.369621 -0.715024 0.900903                                                                                                        | -771.12783263    |
| $[\text{Au}_2\text{Cl}]^+$                         | Au -1.995645 3.106475 0.000000<br>Au -1.918943 -0.598947 0.000001<br>Cl -0.602069 1.281921 0.000001                                                                                                                                                                                                                                             | -731.29110113 Eh |
| $[\text{Au}_2(\text{CH}_2\text{CH}_2)]^+$          | Au -4.755924 0.426633 2.421132<br>Au -2.189804 -0.011332 1.982566<br>C -6.841047 1.019418 2.105349<br>C -6.728617 0.480247 3.374092<br>H -6.990154 -0.556436 3.562073<br>H -6.617365 1.122366 4.242251<br>H -7.193350 0.415805 1.274756<br>H -6.820579 2.094239 1.955491                                                                        | -349.72187310    |
| $[\text{Au}(\text{CH})\text{AuH}]^+$               | Au -4.297039 1.251104 -0.422872<br>C -2.616996 0.259825 -0.471263<br>Au -1.544376 1.861455 -0.360334<br>H -2.365271 -0.655309 0.065992<br>H -0.076828 1.338935 -0.313894                                                                                                                                                                        | -310.36432548    |
| $[\text{Au}_2]^+$                                  | Au -0.191712 -0.032106 1.367387                                                                                                                                                                                                                                                                                                                 | -271.50548729    |



|                                             |                                                                                                                                                                                                                                                                                                                                                                                                                                                                                                                                                             |                |
|---------------------------------------------|-------------------------------------------------------------------------------------------------------------------------------------------------------------------------------------------------------------------------------------------------------------------------------------------------------------------------------------------------------------------------------------------------------------------------------------------------------------------------------------------------------------------------------------------------------------|----------------|
|                                             | Au -0.191712 -0.032106 -1.267660                                                                                                                                                                                                                                                                                                                                                                                                                                                                                                                            |                |
| $[(\text{CH}_3)\text{Au}(\text{CH}_3)]^+$   | Au -4.797108 0.324695 0.130111<br>C -3.255948 1.646757 0.222182<br>H -2.412115 0.993246 -0.015651<br>H -3.236292 2.025981 1.240925<br>H -3.425177 2.410875 -0.531572<br>C -6.214769 1.781065 0.177246<br>H -7.104844 1.195111 0.421352<br>H -6.236158 2.210645 -0.821382<br>H -5.947248 2.489221 0.956170                                                                                                                                                                                                                                                   | -215.12577260  |
| $[\text{AuCl}_2]^-$                         | Au -1.936113 2.153547 0.000000<br>Cl -4.222798 2.061043 0.000000<br>Cl 0.350565 2.246094 0.000000                                                                                                                                                                                                                                                                                                                                                                                                                                                           | -1056.07074733 |
| $[\text{Au}_2\text{Cl}_2(\text{CH}_3)_3]^-$ | Au -1.294616 3.653728 -1.120733<br>Au -1.721580 -0.240883 -0.919247<br>Cl -1.767896 1.626343 -2.419054<br>Cl 0.273929 4.438163 -2.736831<br>C -0.978834 5.308899 0.018036<br>H -1.893686 5.902582 0.034097<br>H -0.166180 5.863241 -0.446048<br>H -0.720249 5.003606 1.032234<br>C -2.641690 3.056969 0.300580<br>H -3.530829 2.701840 -0.221069<br>H -2.897767 3.863223 0.987765<br>H -2.197334 2.222438 0.845948<br>C -1.675251 -1.832857 0.344300<br>H -0.649151 -2.187884 0.486364<br>H -2.271075 -2.664314 -0.046302<br>H -2.078061 -1.558642 1.325165 | -1311.34276020 |

**Table S2:** Full list of experimental DI and DEA threshold values compared to theoretically calculated threshold values at PBE0/def2-TZVP, DLPNO-CCSD(T)/TZVP, and DLPNO-CCSD(T)/SVP levels of theory for the  $[(\text{CH}_3)_2\text{AuCl}]_2$ .

| $m/z$                          | Products                                                                                             | AE (eV)        | PBE0-TZVP (eV) | DLPNO-CCSD(T)-SVP (eV) | DLPNO-CCSD(T)-TZVP (eV) |
|--------------------------------|------------------------------------------------------------------------------------------------------|----------------|----------------|------------------------|-------------------------|
| <b>Dissociative Ionization</b> |                                                                                                      |                |                |                        |                         |
| 524                            | $[\text{Au}_2\text{Cl}_2(\text{CH}_3)_4]^+$                                                          | $9.4 \pm 0.3$  | <b>9.23</b>    | <b>9.69</b>            | <b>9.92</b>             |
| 494                            | $[\text{Au}_2\text{Cl}_2(\text{CH}_3)_2]^+ + 2(\text{CH}_3)$                                         | $9.7 \pm 0.2$  | 13.51          | 13.69                  | 14.06                   |
|                                | $[\text{Au}_2\text{Cl}_2(\text{CH}_3)_2]^+ + \text{CH}_3\text{CH}_3$                                 |                | <b>9.67</b>    | <b>9.86</b>            | <b>10.29</b>            |
|                                | $[\text{Au}_2\text{Cl}_2(\text{CH}_3)_2]^+ + \text{CH}_2\text{CH}_2 + \text{H}_2$                    |                | 11.28          | 11.36                  | 11.65                   |
| 479                            | $[\text{Au}_2\text{Cl}_2(\text{CH}_3)]^+ + 3(\text{CH}_3)$                                           | $11.4 \pm 0.2$ | 15.01          | 14.59                  | 15.04                   |
|                                | $[\text{Au}_2\text{Cl}_2(\text{CH}_3)]^+ + (\text{CH}_3) + \text{CH}_3\text{CH}_3$                   |                | <b>11.18</b>   | <b>10.76</b>           | <b>11.27</b>            |
|                                | $[\text{Au}_2\text{Cl}_2(\text{CH}_3)]^+ + \text{CH}_2\text{CH}_2 + \text{H}_2 + (\text{CH}_3)$      |                | 12.78          | 12.26                  | 12.64                   |
| 464                            | $[\text{Au}_2\text{Cl}_2]^+ + 4(\text{CH}_3)$                                                        | $10.1 \pm 0.2$ | 17.32          | 17.06                  | 17.65                   |
|                                | $[\text{Au}_2\text{Cl}_2]^+ + 2(\text{CH}_3\text{CH}_3)$                                             |                | <b>9.65</b>    | <b>9.41</b>            | <b>10.12</b>            |
|                                | $[\text{Au}_2\text{Cl}_2]^+ + \text{CH}_3\text{CH}_3 + 2(\text{CH}_3)$                               |                | 13.48          | 13.23                  | 13.89                   |
|                                | $[\text{Au}_2\text{Cl}_2]^+ + \text{CH}_2\text{CH}_2 + \text{H}_2 + \text{CH}_3\text{CH}_3$          |                | 11.25          | 10.91                  | 11.49                   |
| 458                            | $[\text{Au}_2\text{Cl}(\text{CH}_2\text{CH}_3)]^+ + 2\text{CH}_3 + \text{Cl} + \text{H}$             | $10.3 \pm 0.2$ | 18.72          | 17.87                  | 18.50                   |
|                                | $[\text{Au}_2\text{Cl}(\text{CH}_2\text{CH}_3)]^+ + \text{CH}_3\text{CH}_3 + \text{Cl} + \text{H}$   |                | 14.88          | 14.04                  | 14.73                   |
|                                | $[\text{Au}_2\text{Cl}(\text{CH}_2\text{CH}_3)]^+ + \text{CH}_3\text{CH}_3 + \text{HCl}$             |                | <b>10.46</b>   | <b>9.88</b>            | <b>10.41</b>            |
|                                | $[\text{Au}_2\text{Cl}(\text{CH}_2\text{CH}_3)]^+ + (\text{CH}_4) + \text{CH}_3\text{Cl}$            |                | <b>10.64</b>   | <b>10.23</b>           | <b>10.60</b>            |
|                                | $[\text{Au}_2\text{Cl}(\text{CH}_2\text{CH}_3)]^+ + 2(\text{CH}_3) + \text{HCl}$                     |                | 15.46          | 16.01                  | 15.41                   |
|                                | $[\text{Au}_2\text{Cl}(\text{CH}_2\text{CH}_3)]^+ + (\text{CH}_3) + \text{CH}_3\text{Cl} + \text{H}$ |                | 15.02          | 14.58                  | 14.97                   |
| 444                            | $[\text{Au}_2\text{Cl}(\text{CH}_3)]^+ + \text{Cl} + 3(\text{CH}_3)$                                 | $13.0 \pm 0.2$ | 17.42          | 16.52                  | 17.29                   |
|                                | $[\text{Au}_2\text{Cl}(\text{CH}_3)]^+ + \text{Cl} + \text{CH}_3\text{CH}_3 + (\text{CH}_3)$         |                | <b>13.58</b>   | <b>12.69</b>           | <b>13.52</b>            |
|                                | $[\text{Au}_2\text{Cl}(\text{CH}_3)]^+ + \text{Cl}(\text{CH}_3) + 2(\text{CH}_3)$                    |                | <b>13.72</b>   | <b>13.23</b>           | <b>13.76</b>            |
|                                | $[\text{Au}_2\text{Cl}(\text{CH}_3)]^+ + \text{Cl}(\text{CH}_3) + \text{CH}_3\text{CH}_3$            |                | 9.88           | 9.40                   | 9.99                    |
| 429                            | $[\text{Au}_2\text{Cl}]^+ + 4(\text{CH}_3) + \text{Cl}$                                              | $12.2 \pm 0.2$ | 19.11          | 18.00                  | 18.84                   |
|                                | $[\text{Au}_2\text{Cl}]^+ + (\text{CH}_3) + \text{CH}_3\text{Cl} + \text{CH}_3\text{CH}_3$           |                | 11.57          | 10.89                  | 11.54                   |
|                                | $[\text{Au}_2\text{Cl}]^+ + \text{HCl} + 2(\text{CH}_4) + \text{CHCH}_2$                             |                | <b>12.54</b>   | <b>11.60</b>           | <b>12.33</b>            |
|                                | $[\text{Au}_2\text{Cl}]^+ + 2 \text{CH}_3\text{CH}_3 + \text{Cl}$                                    |                | 11.44          | 10.35                  | 11.30                   |
|                                | $[\text{Au}_2\text{Cl}]^+ + \text{Cl} + \text{CH}_3\text{CH}_3 + 2(\text{CH}_3)$                     |                | 15.27          | 14.18                  | 15.07                   |
|                                | $[\text{Au}_2\text{Cl}]^+ + 3(\text{CH}_3) + \text{CH}_3\text{Cl}$                                   |                | 15.41          | 14.72                  | 15.31                   |

|     |                                                                                                                           |                   |              |              |              |
|-----|---------------------------------------------------------------------------------------------------------------------------|-------------------|--------------|--------------|--------------|
| 422 | $[\text{Au}_2(\text{CH}_2\text{CH}_2)]^+ + 2(\text{CH}_3) + 2\text{Cl} + 2\text{H}$                                       | <b>10.3 ± 0.3</b> | 22.20        | 20.87        | 21.84        |
|     | <b><math>[\text{Au}_2(\text{CH}_2\text{CH}_2)]^+ + 2\text{Cl}(\text{CH}_3) + \text{H}_2</math></b>                        |                   | <b>10.53</b> | <b>10.09</b> | <b>10.46</b> |
|     | $[\text{Au}_2(\text{CH}_2\text{CH}_2)]^+ + \text{CH}_3\text{CH}_3 + 2\text{HCl}$                                          |                   | 9.51         | 8.72         | 9.44         |
|     | $[\text{Au}_2(\text{CH}_2\text{CH}_2)]^+ + 2\text{CH}_3 + 2\text{HCl}$                                                    |                   | 13.34        | 12.55        | 13.21        |
|     | $[\text{Au}_2(\text{CH}_2\text{CH}_2)]^+ + 2(\text{CH}_3) + \text{Cl}_2 + \text{H}_2$                                     |                   | 15.21        | 14.75        | 15.10        |
|     | $[\text{Au}_2(\text{CH}_2\text{CH}_2)]^+ + \text{CH}_3\text{CH}_3 + \text{Cl}_2 + \text{H}_2$                             |                   | 11.37        | 10.93        | 11.33        |
| 408 | $[\text{Au}_2(\text{CH}_2)]^+ + 3(\text{CH}_3) + 2\text{Cl} + \text{H}$                                                   | <b>13.2 ± 0.2</b> | 24.57        | 23.42        | 24.14        |
|     | <b><math>[\text{Au}_2(\text{CH}_2)]^+ + \text{CH}_2\text{CH}_2 + 2\text{HCl} + \text{CH}_4</math></b>                     |                   | <b>13.35</b> | <b>12.62</b> | <b>13.06</b> |
|     | $[\text{Au}_2(\text{CH}_2)]^+ + 3(\text{CH}_3) + \text{HCl} + \text{Cl}$                                                  |                   | 20.14        | 19.26        | 19.83        |
|     | $[\text{Au}_2(\text{CH}_2)]^+ + \text{CH}_3\text{CH}_3 + \text{CH}_3 + \text{HCl} + \text{Cl}$                            |                   | 16.30        | 15.43        | 16.06        |
|     | $[\text{Au}_2(\text{CH}_2)]^+ + \text{CH}_3\text{CH}_3 + \text{HCl} + \text{Cl}(\text{CH}_3)$                             |                   | 12.60        | 12.15        | 12.54        |
|     | $[\text{Au}_2(\text{CH}_2)]^+ + 2(\text{CH}_3) + \text{HCl} + \text{Cl}(\text{CH}_3)$                                     |                   | 16.44        | 15.97        | 16.30        |
|     | $[\text{Au}_2(\text{CH}_2)]^+ + \text{CH}_2\text{CH}_2 + \text{HCl} + \text{Cl}(\text{CH}_3) + \text{H}_2$                |                   | 14.20        | 13.64        | 13.90        |
|     | $[\text{Au}_2(\text{CH}_2)]^+ + \text{CH}_3 + 2\text{Cl}(\text{CH}_3) + \text{H}$                                         |                   | 17.16        | 16.84        | 17.10        |
| 407 | $[\text{Au}_2(\text{CH})]^+ + 3(\text{CH}_3) + 2\text{H} + 2\text{Cl}$                                                    | <b>13.8 ± 0.2</b> | 28.82        | 27.63        | 28.40        |
|     | $[\text{Au}_2(\text{CH})]^+ + 3(\text{CH}_3) + 2\text{HCl}$                                                               |                   | 19.96        | 19.32        | 19.76        |
|     | $[\text{Au}_2(\text{CH})]^+ + \text{CH}_3\text{CH}_3 + \text{CH}_3 + 2\text{HCl}$                                         |                   | 16.13        | 15.49        | 15.99        |
|     | $[\text{Au}_2(\text{CH})]^+ + (\text{CH}_3) + 2\text{Cl}(\text{CH}_3) + \text{H}_2$                                       |                   | 17.15        | 15.97        | 16.13        |
|     | $[\text{Au}_2(\text{CH})]^+ + \text{CH}_3\text{CH}_3 + \text{Cl} + \text{Cl}(\text{CH}_3) + \text{H}_2$                   |                   | 17.02        | 16.32        | 16.78        |
|     | $[\text{Au}_2(\text{CH})]^+ + \text{CH}_2\text{CH}_2 + \text{Cl} + \text{Cl}(\text{CH}_3) + 2\text{H}_2$                  |                   | 18.62        | 17.82        | 18.14        |
|     | <b><math>[\text{Au}_2(\text{CH})]^+ + \text{CH}_3\text{CH}_3 + \text{Cl} + \text{Cl}(\text{CH}_3) + \text{H}_2</math></b> |                   | <b>13.75</b> | 14.46        | 13.69        |
|     | $[\text{Au}_2(\text{CH})]^+ + 2\text{HCl} + \text{CH}_2\text{CH}_3 + \text{CH}_4$                                         |                   | 15.92        | 15.35        | 15.85        |
| 394 | $[\text{Au}_2]^+ + 4(\text{CH}_3) + 2\text{Cl}$                                                                           | <b>15.3 ± 0.2</b> | 22.39        | 21.94        | 22.09        |
|     | <b><math>[\text{Au}_2]^+ + 2[\text{CH}_3\text{CH}_3] + 2\text{Cl}</math></b>                                              |                   | <b>14.71</b> | <b>14.28</b> | <b>14.56</b> |
|     | <b><math>[\text{Au}_2]^+ + 2(\text{CH}_3) + 2(\text{CH}_3\text{Cl})</math></b>                                            |                   | <b>14.99</b> | <b>15.36</b> | <b>15.05</b> |
|     | <b><math>[\text{Au}_2]^+ + \text{CH}_2\text{CH}_2 + 2(\text{CH}_3) + 2\text{HCl}</math></b>                               |                   | <b>15.56</b> | <b>15.48</b> | <b>15.39</b> |
|     | $[\text{Au}_2]^+ + 4(\text{CH}_3) + \text{Cl}_2$                                                                          |                   | 19.66        | 20.02        | 19.68        |
|     | $[\text{Au}_2]^+ + 2[\text{CH}_3\text{CH}_3] + \text{Cl}_2$                                                               |                   | 11.99        | 12.36        | 12.14        |
|     | $[\text{Au}_2]^+ + \text{CH}_3\text{CH}_3 + 2(\text{CH}_3\text{Cl})$                                                      |                   | 11.15        | 11.53        | 11.28        |
|     | $[\text{Au}_2]^+ + \text{CH}_2\text{CH}_2 + \text{H}_2 + 2(\text{CH}_3\text{Cl})$                                         |                   | 12.75        | 13.03        | 12.65        |
|     | $[\text{Au}_2]^+ + \text{CH}_2\text{CH}_2 + \text{CH}_3\text{CH}_3 + 2\text{HCl}$                                         |                   | 11.72        | 11.66        | 11.62        |
| 227 | $[(\text{CH}_3)\text{Au}(\text{CH}_3)]^+ + 2(\text{CH}_3) + 2\text{Cl} + \text{Au}$                                       | <b>12.4 ± 0.2</b> | 17.81        | 17.90        | 18.72        |
|     | <b><math>[(\text{CH}_3)\text{Au}(\text{CH}_3)]^+ + \text{CH}_3\text{CH}_3 + \text{Cl}_2 + \text{Au}</math></b>            |                   | <b>11.24</b> | <b>12.15</b> | <b>12.54</b> |
|     | <b><math>[(\text{CH}_3)\text{Au}(\text{CH}_3)]^+ + \text{AuCl} + \text{CH}_3\text{CH}_3 + \text{Cl}</math></b>            |                   | <b>12.46</b> | <b>11.63</b> | <b>12.20</b> |
|     | $[(\text{CH}_3)\text{Au}(\text{CH}_3)]^+ + 2(\text{CH}_3) + \text{Cl}_2 + \text{Au}$                                      |                   | 15.08        | 15.98        | 16.31        |

|                                         |                                                                                                           |                |                |                        |                         |
|-----------------------------------------|-----------------------------------------------------------------------------------------------------------|----------------|----------------|------------------------|-------------------------|
|                                         | $[(\text{CH}_3)\text{Au}(\text{CH}_3)]^+ + \text{CH}_3\text{CH}_3 + 2\text{Cl} + \text{Au}$               |                | 13.97          | 14.07                  | 14.95                   |
|                                         | $[(\text{CH}_3)\text{Au}(\text{CH}_3)]^+ + 2\text{Cl}(\text{CH}_3) + \text{Au}$                           |                | 10.41          | 11.32                  | 11.68                   |
|                                         | $[(\text{CH}_3)\text{Au}(\text{CH}_3)]^+ + \text{CH}_2\text{CH}_2 + 2\text{HCl} + \text{Au}$              |                | 10.98          | 11.44                  | 12.01                   |
|                                         | $[(\text{CH}_3)\text{Au}(\text{CH}_3)]^+ + \text{AuCl} + \text{HCl} + \text{CH}_2\text{CH}_2 + \text{H}$  |                | 13.90          | 13.16                  | 13.58                   |
| 225                                     | $[(\text{CH}_2)\text{Au}(\text{CH}_2)]^+ + \text{AuCl} + \text{Cl} + 2(\text{CH}_3) + \text{H}_2$         | $12.6 \pm 0.4$ | 16.45          | 15.52                  | 16.04                   |
|                                         | $[(\text{CH}_2)\text{Au}(\text{CH}_2)]^+ + \text{CH}_3\text{CH}_3 + \text{Au} + \text{Cl}_2 + \text{H}_2$ |                | <u>12.80</u>   | <u>12.22</u>           | <u>12.61</u>            |
|                                         | $[(\text{CH}_2)\text{Au}(\text{CH}_2)]^+ + \text{CH}_3\text{CH}_3 + \text{AuCl} + \text{H} + \text{HCl}$  |                | <u>12.44</u>   | <u>11.73</u>           | <u>12.28</u>            |
|                                         | $[(\text{CH}_2)\text{Au}(\text{CH}_2)]^+ + \text{CH}_3\text{CH}_3 + \text{AuCl} + \text{Cl} + \text{H}_2$ |                | <u>12.61</u>   | <u>11.69</u>           | <u>12.27</u>            |
|                                         | $[(\text{CH}_2)\text{Au}(\text{CH}_2)]^+ + 2\text{Cl}(\text{CH}_3) + \text{Au} + \text{H}_2$              |                | 11.96          | 11.22                  | 11.59                   |
|                                         | $[(\text{CH}_2)\text{Au}(\text{CH}_2)]^+ + 2\text{Cl}(\text{CH}_3) + \text{AuH} + \text{H}$               |                | 13.39          | 12.76                  | 13.24                   |
| <b>Dissociative Electron Attachment</b> |                                                                                                           |                |                |                        |                         |
| <i>m/z</i>                              | Products                                                                                                  | AE (eV)        | PBE0-TZVP (eV) | DLPNO-CCSD(T)-SVP (eV) | DLPNO-CCSD(T)-TZVP (eV) |
| 267                                     | $[\text{AuCl}_2]^- + \text{Au} + 2\text{CH}_3\text{CH}_3$                                                 | 0.1-0.45       | -2.20          | -2.24                  | -1.96                   |
|                                         | $[\text{AuCl}_2]^- + \text{Au}(\text{CH}_3) + \text{CH}_3\text{CH}_3 + \text{CH}_3$                       |                | -0.80          | -0.71                  | -0.67                   |
|                                         | $[\text{AuCl}_2]^- + (\text{CH}_3)\text{Au}(\text{CH}_3) + \text{CH}_3\text{CH}_3$                        |                | -1.82          | -1.39                  | -1.54                   |
| 509                                     | $[\text{M} - \text{CH}_3]^- + \text{CH}_3$                                                                | 0-0.2          | -0.96          | -0.76                  | -0.88                   |
